# Supplementary material for: Heterodimeric diketopiperazine alkaloids from Penicillium expansum MA147 and their cytotoxicity
Source: Royal Society of Chemistry journal article supplement (doi:10.1039/d4ob01245c), 2024-01-01
Supplement: d4ob01245c1.zip [file d4ob01245c1.zip]

## Sheet: Main
Functional		Solvent?		Basis Set		Type of Data
mPW1PW91		PCM		6-31G(d,p)		Shielding Tensors
		H (sDP4+)	1.81369e-21	1	7.87067e-43	2.2687e-17	-	-	-	-	-	-	-	-	-	-	-	-
		C (sDP4+)	0.000767575	0.998225	0.000996368	1.07774e-05	-	-	-	-	-	-	-	-	-	-	-	-
		sDP4+	1.39461e-24	1	7.85603e-46	2.44941e-22	-	-	-	-	-	-	-	-	-	-	-	-
		H (uDP4+)	0.612229	0.236928	5.47418e-05	0.150788	-	-	-	-	-	-	-	-	-	-	-	-
		C (uDP4+)	3.75857e-06	0.00346802	0.99652	8.52294e-06	-	-	-	-	-	-	-	-	-	-	-	-
		uDP4+	0.00261545	0.93392	0.0620034	0.00146072	-	-	-	-	-	-	-	-	-	-	-	-
		H (DP4+)	4.68661e-21	1	1.8185e-46	1.44386e-17	-	-	-	-	-	-	-	-	-	-	-	-
		C (DP4+)	6.47616e-07	0.777115	0.222885	2.06194e-08	-	-	-	-	-	-	-	-	-	-	-	-
		DP4+	3.90563e-27	1	5.21566e-47	3.83105e-25	-	-	-	-	-	-	-	-	-	-	-	-
			Shielding Tensors	Shielding Tensors	Shielding Tensors	Shielding Tensors	Shielding Tensors	Shielding Tensors	Shielding Tensors	Shielding Tensors	Shielding Tensors	Shielding Tensors	Shielding Tensors	Shielding Tensors	Shielding Tensors	Shielding Tensors	Shielding Tensors	Shielding Tensors
Nuclei	sp2?	Experimental	Isomer 1	Isomer 2	Isomer 3	Isomer 4	Isomer 5	Isomer 6	Isomer 7	Isomer 8	Isomer 9	Isomer 10	Isomer 11	Isomer 12	Isomer 13	Isomer 14	Isomer 15	Isomer 16
C	x	166.4	33.2586	36.9566	33.0307	33.1404
C		59.2	135.194	135.327	135.598	135.39
C		37.4	158.242	157.897	157.915	157.609
C		61.8	131.951	132.155	132.298	132.173
C	x	128.8	70.8427	70.3242	70.937	70.9407
C	x	125.4	74.3996	74.5498	74.4042	74.4445
C	x	119	82.0642	82.2664	81.9805	82.128
C	x	129.1	70.5717	70.8622	70.5868	70.4852
C	x	109.1	91.8363	91.9416	91.5128	91.9963
C	x	150.5	50.349	49.6923	49.9287	50.2428
C		78.1	116.345	115.083	115.413	115.956
C	x	158.3	43.714	43.5328	43.9465	44.2488
C	x	125.8	74.112	71.6851	73.985	72.4332
C		41.1	151.182	151.364	151.158	151.145
C	x	143.6	56.2707	55.6896	55.8252	56.1572
C	x	114.8	84.8508	83.8999	83.9885	84.8563
C		23.1	173.975	172.393	172.803	174.2
C		22.6	173.71	176.415	175.45	173.665
C	x	106.5	83.0511	93.4294	84.1269	83.7725
C	x	137.5	65.4058	63.226	65.9381	65.5069
C	x	137.1	66.2732	66.0486	66.0232	63.393
C	x	118.1	77.99	77.1886	79.4451	80.0315
C		52.1	142.211	139.722	139.106	136.817
C		36.5	161.426	157.043	158.407	162.066
C		19.1	177.296	176.896	172.415	171.157
C		34.2	163.439	162.347	158.999	164.316
C		72.3	124.645	125.996	120.581	122.03
C	x	170.9	30.0658	30.5374	32.9896	30.2849
C		105	92.6303	92.7535	90.6892	92.8431
C	x	166.7	35.3648	34.1955	38.5584	35.1815
C	x	103.7	97.6893	97.9342	96.0316	97.7908
C	x	162.7	38.6543	40.0628	38.7363	38.5837
C	x	113.6	89.4818	89.7123	88.8718	87.4006
C	x	138.2	59.9367	59.5751	59.3293	60.5777
C		52.4	149.85	148.988	146.911	149.317
C	x	203.8	-11.0684	-7.19279	-6.90218	-13.0955
C		47.8	145.108	147.772	145.87	148.147
C		19.3	178.07	177.722	174.757	176.195
H		4.16	27.5464	27.7569	27.6327	27.5782
H		2.5	29.3361	29.3567	29.2546	29.2956
H		2.61	29.129	29.283	29.1591	29.1747
H	x	7.18	24.326	24.2853	24.249	24.2839
H	x	6.76	24.7929	24.8244	24.7556	24.7952
H	x	7.1	24.3638	24.4043	24.3491	24.3557
H	x	6.59	25.0452	25.0861	25.0053	25.0296
H		5.68	26.0812	26.3099	26.2214	26.154
H	x	6.01	25.0526	25.0452	25.0268	25.1917
H	x	5.14	26.3288	26.2305	26.2058	26.3283
H		1.05	30.7446	30.5679	30.6072	30.6997
H		1.16	30.4891	30.815	30.6967	30.5562
H	x	6.62	24.6937	25.4169	24.7975	24.7065
H	x	7.29	24.0729	23.9716	24.0785	24.1313
H	x	6.94	25.1569	25.4141	25.7148	25.1378
H		5.38	27.0923	27.1504	27.5356	27.535
H		1.71	29.853	30.191	30.0253	30.1305
H		1.96	29.5834	29.8804	29.6796	29.3672
H		1.59	29.8138	29.9002	29.8707	29.8264
H		1.59	30.0446	29.9664	30.0161	29.942
H		1.79	29.7378	29.8119	29.7218	29.8849
H		5.14	25.812	25.4768	26.0921	26.1078
H	x	6.56	25.4642	25.2019	25.2581	25.3684
H	x	6.18	24.5538	25.2481	25.0069	24.164
H		3.63	28.4727	28.5617	28.5822	28.5287
H		4.7	27.1289	26.8891	26.3262	26.5315
H		3.35	28.4346	28.3163	28.4455	28.2739
H		2.6	29.6149	29.2367	29.7875	29.338
H		1.33	30.3058	30.261	30.3042	30.267
H		4.93	27.1213	27.3092	27.192	27.2918
H		12.22	24.654	21.1022	24.5764	23.6931
H		11.91	20.2763	19.5488	22.8451	20.0562

## Sheet: Calculo DP4
	TMS (13C)	TMS (1H)	TMS (13C, sp2)	TMS (13C, sp3)	TMS (1H, sp2)	TMS (1H, sp3)
Promedio			-2.36505	1.7422	0.232759	-0.038035						All	1.19597e-91					Experimental	A	B	C	D	E	F	G	H	I	J	K	L	M	N	O	P
Sigma	1.39104	0.105071	1.67451	1.50789	0.136467	0.115746						C	3.47773e-39					DP4++
DF	5.57631	4.32256	4.67254	6.21607	6.95419	4.02594						H	3.44505e-53
2.66942e-42	3.47156e-39	3.4651e-42	3.74808e-44	0	0	0	0	0	0	0	0	0	0	0	0
1.66791e-115	1.19597e-91	9.39555e-137	2.92942e-113	0	0	0	0	0	0	0	0	0	0	0	0		6.24823e-74	3.44505e-53	2.71148e-95	7.81579e-70	0	0	0	0	0	0	0	0	0	0	0	0		38	3791.6	475613	3704.89	3699.29	3723.64	3721.75	0	0	0	0	0	0	0	0	0
Probabilidad																	Probabilidad																	C?	Exp C	Exp C^2	Unscaled C
A	B	C	D	E	F	G	H	I	J	K	L	M	N	O	P		A	B	C	D	E	F	G	H	I	J	K	L	M	N	O	P					A	B	C	D	E	F	G	H	I	J	K	L	M
0.345081	0.0657302	0.108768	0.346721																															1	166.4	27689	162.67	158.972	162.898	162.788
0.0566306	0.0763961	0.298205	0.124027																															1	59.2	3504.64	60.7345	60.6012	60.33	60.5385
0.318184	0.327314	0.253491	0.344052																															1	37.4	1398.76	37.6866	38.0314	38.0139	38.3193
0.0288585	0.0401318	0.141472	0.0630109																															1	61.8	3819.24	63.9778	63.7731	63.6301	63.7554
0.34932	0.398773	0.369222	0.253844																															1	128.8	16589.4	125.086	125.604	124.991	124.988
0.286445	0.33719	0.305391	0.209777																															1	125.4	15725.2	121.529	121.379	121.524	121.484
0.0764907	0.0834316	0.0752753	0.0508101																															1	119	14161	113.864	113.662	113.948	113.8
0.344289	0.371169	0.38716	0.290598																															1	129.1	16666.8	125.357	125.066	125.342	125.443
0.0649008	0.0715027	0.0641894	0.0377356																															1	109.1	11902.8	104.092	103.987	104.416	103.932
0.225531	0.461111	0.49814	0.206368																															1	150.5	22650.2	145.579	146.236	146	145.686
0.0346921	0.0114776	0.0344138	0.0396125																															1	78.1	6099.61	79.5836	80.8451	80.5156	79.9729
0.096266	0.205284	0.169152	0.0487479																															1	158.3	25058.9	152.214	152.396	151.982	151.68
0.264175	0.108896	0.315351	0.376798																															1	125.8	15825.6	121.816	124.243	121.943	123.495
0.0137868	0.021339	0.0695481	0.0246622																															1	41.1	1689.21	44.7462	44.5647	44.7704	44.7839
0.407435	0.294408	0.323655	0.374187																															1	143.6	20621	139.658	140.239	140.103	139.771
0.248906	0.431809	0.423763	0.178177																															1	114.8	13179	111.078	112.029	111.94	111.072
0.209389	0.466908	0.0708294	0.0794845																															1	23.1	533.61	21.9534	23.5351	23.125	21.7285
0.379362	0.0204943	0.00967845	0.205492																															1	22.6	510.76	22.2189	19.5135	20.478	22.263
0.000612568	0.186016	0.00119727	0.00110855																															1	106.5	11342.2	112.877	102.499	111.802	112.156
0.0231588	0.264942	0.0187699	0.0165217																															1	137.5	18906.2	130.523	132.702	129.99	130.422
0.0152358	0.0273045	0.0244995	0.169478																															1	137.1	18796.4	129.655	129.88	129.905	132.535
0.0520717	0.0183741	0.210472	0.422304																															1	118.1	13947.6	117.938	118.74	116.483	115.897
0.064248	0.0086259	0.0149672	0.00153474																															1	52.1	2714.41	53.7171	56.2062	56.8224	59.1112
0.140026	0.0692627	0.338621	0.0372559																															1	36.5	1332.25	34.502	38.8854	37.5213	33.8628
0.330129	0.293697	0.106488	0.00875442																															1	19.1	364.81	18.6328	19.0326	23.5135	24.7712
0.171086	0.302217	0.240106	0.0361898																															1	34.2	1169.64	32.4899	33.5817	36.9296	31.6122
0.38063	0.242785	0.0254857	0.0623403																															1	72.3	5227.29	71.2836	69.9329	75.3473	73.8987
0.337305	0.411614	0.0664287	0.260497																															1	170.9	29206.8	165.863	165.391	162.939	165.644
0.303905	0.286177	0.0700028	0.469954																															1	105	11025	103.298	103.175	105.239	103.085
0.116774	0.481854	0.0149766	0.122254																															1	166.7	27788.9	160.564	161.733	157.37	160.747
0.0362745	0.0333259	0.114399	0.0221154																															1	103.7	10753.7	98.2391	97.9942	99.8968	98.1376
0.20045	0.10138	0.401223	0.186602																															1	162.7	26471.3	157.274	155.866	157.192	157.345
0.0107246	0.0106908	0.0142262	0.047908																															1	113.6	12905	106.447	106.216	107.057	108.528
0.200497	0.0905639	0.0743069	0.406353																															1	138.2	19099.2	135.992	136.353	136.599	135.351
0.00487021	0.00741865	0.0128425	0.00432564																															1	52.4	2745.76	46.0787	46.9406	49.0175	46.611
0.000691268	0.00373514	0.00232347	0.000249811																															1	203.8	41534.4	206.997	203.121	202.831	209.024
0.0198395	0.29592	0.191023	0.499357																															1	47.8	2284.84	50.8204	48.1568	50.0582	47.7812
0.14466	0.118761	0.320413	0.349851																															1	19.3	372.49	17.8582	18.2063	21.1712	19.7337
0.403921	0.075607	0.439086	0.375613														0.403921	0.075607	0.439086	0.375613														0
0.00742492	0.0846674	0.00808371	0.0171966														0.00742492	0.0846674	0.00808371	0.0171966														0
0.0240556	0.0581595	0.00900555	0.0222794														0.0240556	0.0581595	0.00900555	0.0222794														0
0.000731669	0.0117888	9.91229e-05	0.0013498														0.000731669	0.0117888	9.91229e-05	0.0013498														0
0.00141986	0.043047	0.00020653	0.00355167														0.00141986	0.043047	0.00020653	0.00355167														0
0.000623296	0.0171895	0.000114442	0.00136316														0.000623296	0.0171895	0.000114442	0.00136316														0
0.0030297	0.129329	0.000361154	0.00710923														0.0030297	0.129329	0.000361154	0.00710923														0
0.0415685	0.0558106	0.0187233	0.281721														0.0415685	0.0558106	0.0187233	0.281721														0
0.000212764	0.000966951	6.35491e-05	0.000688775														0.000212764	0.000966951	6.35491e-05	0.000688775														0
0.00483595	0.00889625	0.00055025	0.00892914														0.00483595	0.00889625	0.00055025	0.00892914														0
0.00175779	0.412178	0.00119315	0.00513109														0.00175779	0.412178	0.00119315	0.00513109														0
0.00615505	0.0159123	0.000423434	0.00766298														0.00615505	0.0159123	0.000423434	0.00766298														0
0.000425527	0.0454867	0.000155538	0.000903053														0.000425527	0.0454867	0.000155538	0.000903053														0
0.000329523	0.00250773	7.31354e-05	0.000972389														0.000329523	0.00250773	7.31354e-05	0.000972389														0
0.256583	0.00318119	0.0272639	0.372119														0.256583	0.00318119	0.0272639	0.372119														0
0.00168399	0.000876054	0.000255073	0.000164151														0.00168399	0.000876054	0.000255073	0.000164151														0
0.0370413	0.039485	0.00198534	0.00471543														0.0370413	0.039485	0.00198534	0.00471543														0
0.0778511	0.0845175	0.00749356	0.146487														0.0778511	0.0845175	0.00749356	0.146487														0
0.229249	0.0870284	0.0216548	0.40937														0.229249	0.0870284	0.0216548	0.40937														0
0.0133937	0.186553	0.00462739	0.104314														0.0133937	0.186553	0.00462739	0.104314														0
0.0676087	0.28605	0.0201756	0.0248504														0.0676087	0.28605	0.0201756	0.0248504														0
0.000235272	0.000175886	0.000304278	0.00165245														0.000235272	0.000175886	0.000304278	0.00165245														0
0.216202	0.332969	0.00140837	0.242789														0.216202	0.332969	0.00140837	0.242789														0
6.1581e-05	0.0111023	9.36636e-05	3.17566e-05														6.1581e-05	0.0111023	9.36636e-05	3.17566e-05														0
0.00342225	0.00491608	0.00146424	0.00250144														0.00342225	0.00491608	0.00146424	0.00250144														0
0.43434	0.09164	0.000187171	0.00211045														0.43434	0.09164	0.000187171	0.00211045														0
0.0557989	0.33904	0.0501008	0.436557														0.0557989	0.33904	0.0501008	0.436557														0
0.000604715	0.110545	0.000162794	0.0051528														0.000604715	0.110545	0.000162794	0.0051528														0
0.00886399	0.295183	0.0022256	0.0317989														0.00886399	0.295183	0.0022256	0.0317989														0
0.0423955	0.00463526	0.0782589	0.00515111														0.0423955	0.00463526	0.0782589	0.00515111														0
8.07167e-07	9.61763e-05	1.29994e-06	2.0008e-06														8.07167e-07	9.61763e-05	1.29994e-06	2.0008e-06														0
0.000551963	0.00365961	6.27071e-05	0.000880129														0.000551963	0.00365961	6.27071e-05	0.000880129														0
																																		0
																																		0
																																		0
																																		0
																																		0
																																		0
																																		0
																																		0
																																		0
																																		0
																																		0
																																		0
																																		0
																																		0
																																		0
																																		0
																																		0
																																		0
																																		0
																																		0
																																		0
																																		0
																																		0
																																		0
																																		0
																																		0
																																		0
																																		0
																																		0
																																		0
																																		0
																																		0
																																		0
																																		0
																																		0
																																		0
																																		0
																																		0
																																		0
																																		0
																																		0
																																		0
																																		0
																																		0
																																		0
																																		0
																																		0
																																		0
																																		0
																																		0
																																		0
																																		0
																																		0
																																		0
																																		0
																																		0
																																		0
																																		0
																																		0
																																		0
																																		0
																																		0
																																		0
																																		0
																																		0
																																		0
																																		0
																																		0
																																		0
																																		0
																																		0
																																		0
																																		0
																																		0
																																		0
																																		0
																																		0
																																		0
																																		0
																																		0
																																		0
																																		0
																																		0
																																		0
																																		0
																																		0
																																		0
																																		0
																																		0
																																		0
																																		0
																																		0
																																		0
																																		0
																																		0
																																		0
																																		0
																																		0
																																		0
																																		0
																																		0
																																		0
																																		0
																																		0
																																		0
																																		0
																																		0
																																		0
																																		0
																																		0
																																		0
																																		0
																																		0
																																		0
																																		0
																																		0
[truncated: 120 more columns]

## Sheet: Chemical Shifts
	Chemical Shifts			TMS	C	195.928
					H	31.6342
Experimental	Unscaled Shifts																	Error Unscaled																	Scaled shifts
	A	B	C	D	E	F	G	H	I	J	K	L	M	N	O	P		A	B	C	D	E	F	G	H	I	J	K	L	M	N	O	P		A	B	C	D	E	F	G	H	I	J	K	L	M	N	O
166.4	162.67	158.972	162.898	162.788														-3.73011	-7.42815	-3.5022	-3.61198														166.988	163.894	168.362	166.981
59.2	60.7345	60.6012	60.33	60.5385														1.53445	1.40125	1.13005	1.33855														61.8676	61.544	59.9861	61.0183
37.4	37.6866	38.0314	38.0139	38.3193														0.28655	0.63135	0.61395	0.91925														38.0996	38.0611	36.4064	37.992
61.8	63.9778	63.7731	63.6301	63.7554														2.17785	1.97305	1.83005	1.95545														65.2123	64.8441	63.473	64.352
128.8	125.086	125.604	124.991	124.988														-3.7143	-3.19576	-3.80859	-3.81224														128.229	129.176	128.309	127.808
125.4	121.529	121.379	121.524	121.484														-3.87118	-4.02132	-3.87576	-3.91602														124.561	124.78	124.645	124.177
119	113.864	113.662	113.948	113.8														-5.13574	-5.33796	-5.05207	-5.19953														116.657	116.751	116.64	116.215
129.1	125.357	125.066	125.342	125.443														-3.7432	-4.03379	-3.75835	-3.65679														128.509	128.617	128.679	128.28
109.1	104.092	103.987	104.416	103.932														-5.00782	-5.1131	-4.68433	-5.1678														106.58	106.685	106.568	105.988
150.5	145.579	146.236	146	145.686														-4.92052	-4.26387	-4.50025	-4.81431														149.363	150.643	150.507	149.258
78.1	79.5836	80.8451	80.5156	79.9729														1.48355	2.74505	2.41555	1.87295														81.3056	82.6066	81.3146	81.1585
158.3	152.214	152.396	151.982	151.68														-6.08552	-5.90433	-6.31808	-6.62038														156.206	157.051	156.828	155.469
125.8	121.816	124.243	121.943	123.495														-3.98353	-1.55663	-3.85657	-2.30477														124.858	127.76	125.088	126.261
41.1	44.7462	44.5647	44.7704	44.7839														3.64615	3.46465	3.67035	3.68385														45.3798	44.8587	43.5453	44.6914
143.6	139.658	140.239	140.103	139.771														-3.94228	-3.36117	-3.4967	-3.8288														143.257	144.403	144.276	143.128
114.8	111.078	112.029	111.94	111.072														-3.72231	-2.77146	-2.86009	-3.72789														113.784	115.052	114.518	113.387
23.1	21.9534	23.5351	23.125	21.7285														-1.14665	0.43515	0.02505	-1.37145														21.8749	22.9786	20.6744	20.7988
22.6	22.2189	19.5135	20.478	22.263														-0.38115	-3.08655	-2.12195	-0.33695														22.1487	18.7942	17.8775	21.3527
106.5	112.877	102.499	111.802	112.156														6.3774	-4.00091	5.30151	5.65591														115.64	105.137	114.372	114.51
137.5	130.523	132.702	129.99	130.422														-6.97735	-4.79757	-7.50963	-7.07843														133.836	136.562	133.591	133.439
137.1	129.655	129.88	129.905	132.535														-7.4447	-7.22018	-7.19471	-4.56452														132.942	133.625	133.501	135.63
118.1	117.938	118.74	116.483	115.897														-0.16159	0.63983	-1.61668	-2.20304														120.859	122.034	119.319	118.387
52.1	53.7171	56.2062	56.8224	59.1112														1.61705	4.10615	4.72235	7.01125														54.631	56.9711	56.2798	59.5391
36.5	34.502	38.8854	37.5213	33.8628														-1.99795	2.38545	1.02125	-2.63725														34.8156	38.9498	35.8858	33.3737
19.1	18.6328	19.0326	23.5135	24.7712														-0.46715	-0.06735	4.41345	5.67115														18.4506	18.2939	21.0848	23.9519
34.2	32.4899	33.5817	36.9296	31.6122														-1.71005	-0.61825	2.72955	-2.58775														32.7407	33.4315	35.2606	31.0414
72.3	71.2836	69.9329	75.3473	73.8987														-1.01635	-2.36715	3.04735	1.59865														72.7464	71.253	75.8537	74.8636
170.9	165.863	165.391	162.939	165.644														-5.03734	-5.50896	-7.96113	-5.25644														170.28	170.573	168.405	169.94
105	103.298	103.175	105.239	103.085														-1.70189	-1.82501	0.23928	-1.91465														105.761	105.84	107.438	105.11
166.7	160.564	161.733	157.37	160.747														-6.13638	-4.967	-9.32992	-5.95305														164.816	166.767	162.521	164.866
103.7	98.2391	97.9942	99.8968	98.1376														-5.46089	-5.70575	-3.8032	-5.56236														100.544	100.45	101.793	99.9828
162.7	157.274	155.866	157.192	157.345														-5.42584	-6.83434	-5.50782	-5.35522														161.424	160.662	162.333	161.34
113.6	106.447	106.216	107.057	108.528														-7.15333	-7.38383	-6.54339	-5.0722														109.008	109.004	109.359	110.75
138.2	135.992	136.353	136.599	135.351														-2.20821	-1.84661	-1.60086	-2.84925														139.476	140.36	140.574	138.547
52.4	46.0787	46.9406	49.0175	46.611														-6.32125	-5.45945	-3.38245	-5.78905														46.754	47.3307	48.033	46.5848
203.8	206.997	203.121	202.831	209.024														3.19685	-0.67876	-0.96937	5.22395														212.7	209.829	210.556	214.896
47.8	50.8204	48.1568	50.0582	47.7812														3.02045	0.35685	2.25825	-0.01875														51.6439	48.5962	49.1327	47.7976
19.3	17.8582	18.2063	21.1712	19.7337														-1.44175	-1.09365	1.87115	0.43375														17.6518	17.4342	18.6098	18.7315
4.16	4.08773	3.87727	4.00145	4.05598														-0.072265	-0.282725	-0.158555	-0.104015														4.1873	3.97389	4.17716	4.12432
2.5	2.29804	2.27749	2.3796	2.33854														-0.201955	-0.222505	-0.120395	-0.161465														2.06918	2.32405	2.08001	2.16864
2.61	2.50516	2.35115	2.4751	2.45945														-0.104835	-0.258845	-0.134895	-0.150545														2.31431	2.40002	2.2035	2.30634
7.18	7.30815	7.34886	7.38515	7.35032														0.128155	0.168855	0.205155	0.170325														7.9987	7.55409	8.55254	7.8756
6.76	6.84132	6.80973	6.87855	6.83893														0.081325	0.049735	0.118555	0.078935														7.4462	6.99811	7.89747	7.29328
7.1	7.27035	7.22988	7.28508	7.27845														0.170355	0.129885	0.185085	0.178455														7.95396	7.4314	8.42314	7.79377
6.59	6.58901	6.54804	6.62889	6.60459														-0.000985	-0.041955	0.038885	0.014585														7.14759	6.72823	7.57463	7.02643
5.68	5.55298	5.32432	5.41278	5.48021														-0.127015	-0.355675	-0.267215	-0.199785														5.92144	5.46622	6.00213	5.7461
6.01	6.5816	6.589	6.6074	6.44247														0.571595	0.578995	0.597405	0.432475														7.13881	6.77046	7.54685	6.84183
5.14	5.30541	5.40364	5.4284	5.30586														0.16541	0.26364	0.288405	0.16586														5.62843	5.54801	6.02232	5.54756
1.05	0.889625	1.06623	1.027	0.934488														-0.160375	0.016235	-0.0229983	-0.115512														0.402302	1.07489	0.330996	0.569844
1.16	1.14506	0.819168	0.937485	1.07796														-0.0149383	-0.340832	-0.222515	-0.082035														0.704614	0.820096	0.215244	0.733222
6.62	6.94047	6.21729	6.83667	6.92772														0.320475	-0.402715	0.216675	0.307725														7.56354	6.38712	7.84332	7.39439
7.29	7.5613	7.66258	7.55562	7.50288														0.271305	0.372585	0.265625	0.212885														8.2983	7.87764	8.77297	8.04933
6.94	6.47724	6.22004	5.91933	6.49642														-0.462755	-0.719955	-1.02067	-0.443575														7.01531	6.38996	6.65712	6.90326
5.38	4.54182	4.48376	4.09853	4.09915														-0.838175	-0.896235	-1.28147	-1.28085														4.72472	4.59936	4.30271	4.17346
1.71	1.78119	1.44318	1.6089	1.50371														0.071185	-0.266815	-0.101105	-0.206295														1.45747	1.46364	1.08343	1.21802
1.96	2.05076	1.75372	1.95453	2.26694														0.090765	-0.206275	-0.005465	0.306935														1.77652	1.78389	1.53036	2.08711
1.59	1.8204	1.73393	1.76351	1.8078														0.230405	0.143935	0.17351	0.2178														1.50389	1.76349	1.28335	1.56429
1.59	1.58957	1.66778	1.61811	1.6922														-0.000435	0.077785	0.028115	0.102205														1.23069	1.69527	1.09535	1.43266
1.79	1.89635	1.82225	1.9124	1.74929														0.106355	0.032255	0.122395	-0.040715														1.59378	1.85457	1.47587	1.49766
5.14	5.82212	6.15741	5.54209	5.52636														0.682125	1.01741	0.402085	0.386365														6.23997	6.32536	6.16932	5.79865
6.56	6.16995	6.43232	6.37605	6.2658														-0.390045	-0.127675	-0.183945	-0.294205														6.65163	6.60889	7.2477	6.64064
6.18	7.08042	6.38605	6.62723	7.47015														0.900425	0.206055	0.447235	1.29015														7.72918	6.56117	7.5725	8.01206
3.63	3.16152	3.07244	3.052	3.10546														-0.468475	-0.557555	-0.577995	-0.524535														3.09112	3.14388	2.94947	3.04195
4.7	4.5053	4.7451	5.30797	5.10267														-0.194705	0.045105	0.607975	0.402675														4.68148	4.86887	5.8666	5.31619
3.35	3.19961	3.31784	3.18867	3.36028														-0.150385	-0.032155	-0.161325	0.010285														3.1362	3.39696	3.12619	3.33212
2.6	2.01925	2.3975	1.84667	2.29619														-0.580745	-0.202495	-0.753325	-0.303805														1.73923	2.44782	1.39089	2.12043
1.33	1.32835	1.37313	1.32994	1.36716														-0.00165167	0.043135	-5.5e-05	0.037155														0.921535	1.3914	0.722723	1.06253
4.93	4.51286	4.32496	4.44213	4.34233														-0.417135	-0.605035	-0.487875	-0.587665														4.69044	4.43559	4.74699	4.45038
12.22	6.98021	10.532	7.05778	7.94105														-5.23979	-1.68798	-5.16222	-4.27895														7.61058	10.8369	8.12923	8.54827
11.91	11.3579	12.0854	8.78909	11.578														-0.552105	0.175355	-3.12091	-0.332005														12.7916	12.4388	10.3679	12.6897
[truncated: 17 more columns]

## Sheet: Statistics
		B3LYP	B3LYP	B3LYP	B3LYP	B3LYP	B3LYP	B3LYP	B3LYP	B3LYP	B3LYP	B3LYP	B3LYP	mPW1PW91	mPW1PW91	mPW1PW91	mPW1PW91	mPW1PW91	mPW1PW91	mPW1PW91	mPW1PW91	mPW1PW91	mPW1PW91	mPW1PW91	mPW1PW91
		Gas Phase	Gas Phase	Gas Phase	Gas Phase	Gas Phase	Gas Phase	PCM	PCM	PCM	PCM	PCM	PCM	Gas Phase	Gas Phase	Gas Phase	Gas Phase	Gas Phase	Gas Phase	PCM	PCM	PCM	PCM	PCM	PCM
		6-31G(d)	6-31G(d,p)	6-31+G(d,p)	6-311G(d)	6-311G(d,p)	6-311+G(d,p)	6-31G(d)	6-31G(d,p)	6-31+G(d,p)	6-311G(d)	6-311G(d,p)	6-311+G(d,p)	6-31G(d)	6-31G(d,p)	6-31+G(d,p)	6-311G(d)	6-311G(d,p)	6-311+G(d,p)	6-31G(d)	6-31G(d,p)	6-31+G(d,p)	6-311G(d)	6-311G(d,p)	6-311+G(d,p)
TMS	C	189.715	191.55	192.59	183.613	183.89	183.425	190.072	191.894	193.071	184.105	184.35	183.889	193.86	195.536	196.095	188.845	189.159	188.679	194.267	195.928	196.609	188.237	188.488	188.019
	H	32.1826	31.7142	31.6377	32.2012	31.9154	31.9017	32.1769	31.7082	31.6354	32.1985	31.9135	31.9016	32.1159	31.6431	31.5661	32.3737	32.0829	32.066	32.1073	31.6342	31.56	32.0903	31.795	31.7794
13C	μ	-6.15715	-4.61606	-2.68191	5.91751	6.53847	7.37113	-5.22641	-3.69604	-1.41664	7.27884	7.8086	8.91946	-4.78708	-3.34644	-2.18474	6.08432	6.78107	7.51542	-3.78728	-2.36505	-0.920103	6.32051	6.88451	7.9112
TMS-sp2	σ	2.4881	2.45534	2.29377	2.34929	2.24132	2.25215	1.83816	1.83738	1.99389	2.6465	2.40903	3.06411	2.41018	2.30354	2.1048	2.03971	2.04768	1.96513	1.72432	1.67451	1.74836	2.30998	2.1444	2.70164
non scaled	ν	6.53169	6.71433	8.04852	5.85943	5.02616	6.18926	4.62479	4.85981	6.56201	14.7419	8.78056	77.0241	7.0255	6.53053	6.55087	4.27583	4.12181	4.83931	4.48409	4.67254	5.36432	9.6047	6.66323	46.5625
	σ (normal)	2.96217	2.9074	2.63842	2.87726	2.84664	2.70956	2.40552	2.36753	2.38315	2.84927	2.73662	3.10835	2.8314	2.74187	2.50522	2.78214	2.81627	2.50538	2.2734	2.18624	2.18579	2.59483	2.54504	2.76457
13C	μ	1.30169	2.04739	3.58432	4.73268	5.26472	5.15711	1.59602	2.33587	4.04354	5.16473	5.67784	5.59907	0.745258	1.40997	2.43126	4.28356	4.85143	4.74827	1.0866	1.7422	2.90851	3.64118	4.15413	4.07177
TMS-sp3	σ	1.64843	1.76485	1.89926	2.28492	2.21155	2.29444	1.59394	1.75193	1.89524	2.35496	2.27057	2.39501	1.48416	1.51634	1.605	1.73986	1.68907	1.81447	1.43273	1.50789	1.60002	1.8576	1.78708	1.93521
non scaled	ν	6.28871	7.31553	7.18404	15.7276	14.1474	18.5839	6.06483	7.41489	7.35941	20.6973	17.4074	23.2351	5.69123	6.06996	6.03928	6.30303	6.17786	8.74423	5.55839	6.21607	6.26933	9.39748	8.59154	11.1564
	σ (normal)	1.98624	2.06919	2.24605	2.4519	2.39318	2.43421	1.93897	2.05159	2.23429	2.48348	2.41999	2.51011	1.83387	1.85009	1.9745	2.12398	2.07267	2.07455	1.78574	1.83361	1.95831	2.1048	2.05147	2.14652
13C	μ	0	0	0	0.00277449	0.0172877	0.00674284	0	0	0	0.000289038	0.0111267	1.21096e-06	0	0	0	-0.0234379	-0.0109713	-0.00668193	0	0	0	-0.0120936	-0.00495345	-0.00704883
TMS	σ	1.58055	1.85247	2.08726	1.921	1.83737	1.83264	1.52502	1.7837	2.03419	1.84099	1.73777	1.80268	1.26683	1.44624	1.59781	1.60284	1.5465	1.5815	1.22669	1.39104	1.55688	1.56	1.49141	1.57491
scaled	ν	5.9698	8.73613	10.3855	7.16395	6.34092	7.38631	6.08745	8.77712	10.1722	7.31515	6.36554	7.9432	4.19213	5.32533	6.11338	4.90493	4.48449	5.76123	4.43106	5.57631	6.22741	5.79833	5.22565	6.67108
	σ (normal)	1.94342	2.11978	2.33267	2.26664	2.22047	2.15263	1.87053	2.04211	2.28019	2.1664	2.10169	2.09399	1.7325	1.83453	1.96077	2.07778	2.0586	1.96008	1.65399	1.74974	1.90461	1.93468	1.8987	1.8967
1H	μ	-0.171925	0.0159485	0.138598	-0.0354161	0.111883	0.162719	-0.091308	0.0971134	0.238028	0.062934	0.206232	0.266995	-0.0443987	0.13999	0.238698	0.305337	0.477599	0.516385	0.0473524	0.232759	0.34745	0.133253	0.296871	0.343706
TMS-sp2	σ	0.194369	0.177174	0.163413	0.169267	0.149174	0.144683	0.171758	0.149112	0.13195	0.147634	0.123977	0.118743	0.184901	0.16657	0.148632	0.167843	0.142467	0.137882	0.161845	0.136467	0.117602	0.146815	0.116941	0.111844
non scaled	ν	13.8078	9.19837	6.839	10.9349	7.27386	5.78487	10.3365	7.26778	5.34657	8.85427	5.98685	5.19593	13.0422	8.59532	5.84044	10.2054	6.24979	5.39422	10.5755	6.95419	4.91104	8.76351	5.31536	4.87978
	σ (normal)	0.210646	0.201038	0.196459	0.187886	0.176398	0.179493	0.192159	0.178113	0.172397	0.169229	0.155875	0.156214	0.201381	0.191039	0.184977	0.187633	0.173418	0.174084	0.180888	0.165547	0.158815	0.168409	0.151612	0.150091
1H	μ	-0.0561575	-0.0722184	-0.0599729	-0.0288862	-0.0718407	-0.0509424	-0.0131677	-0.0272398	-0.00325076	0.0185637	-0.0215344	0.00762662	-0.0649484	-0.084856	-0.0747853	0.238708	0.192553	0.209335	-0.0206884	-0.038035	-0.0179637	0.0090667	-0.0386016	-0.0142804
TMS-sp3	σ	0.168657	0.148681	0.134488	0.149354	0.130248	0.1354	0.151376	0.130353	0.119097	0.125553	0.104728	0.114686	0.156481	0.135857	0.126639	0.14775	0.123002	0.131123	0.136409	0.115746	0.111827	0.125046	0.0980982	0.110542
non scaled	ν	6.95016	4.8281	4.04736	3.9246	3.342	3.53082	7.44085	4.71548	3.97176	3.46635	2.75586	3.03266	6.12888	4.22332	3.68368	3.87844	3.12441	3.38758	6.25884	4.02594	3.65112	3.53603	2.59945	2.89114
	σ (normal)	0.199099	0.19085	0.183392	0.205402	0.192812	0.1958	0.176218	0.167701	0.16253	0.18129	0.171176	0.177645	0.189697	0.182109	0.178954	0.204092	0.188383	0.193248	0.16432	0.157201	0.157779	0.179107	0.166418	0.175278
1H	μ	0	0	0	-0.000179291	0.0021919	0.000608421	0	0	0	-0.000604127	0.00210487	0.00116225	0	0	0	-0.0012447	0.000240715	-0.000913512	0	0	0	-0.0013901	0.00108649	0.000381146
TMS	σ	0.139819	0.128443	0.127254	0.11648	0.113258	0.118515	0.1292	0.115038	0.110343	0.103074	0.0954158	0.0990949	0.128023	0.119938	0.121682	0.112954	0.10971	0.11742	0.116753	0.105071	0.104352	0.100698	0.0930643	0.0983406
scaled	ν	5.94175	4.81145	4.70287	3.29476	3.19661	3.40946	6.40805	4.8971	4.273	3.22789	2.84979	2.92919	5.0298	4.30333	4.31843	3.1597	3.06114	3.39377	5.54277	4.32256	3.89349	3.15667	2.78407	2.89125
	σ (normal)	0.171655	0.16663	0.166445	0.17657	0.175245	0.177658	0.155407	0.147865	0.147518	0.158326	0.157304	0.159931	0.164092	0.161331	0.163494	0.174909	0.173221	0.176632	0.145278	0.140549	0.144119	0.156234	0.155093	0.159406

## Sheet: Detailed Results
Functional		Solvent?		Basis Set		Type of Data
mPW1PW91		PCM		6-31G(d,p)		Shielding Tensors
		Isomer 1	Isomer 2	Isomer 3	Isomer 4	Isomer 5	Isomer 6	Isomer 7	Isomer 8	Isomer 9	Isomer 10	Isomer 11	Isomer 12	Isomer 13	Isomer 14	Isomer 15	Isomer 16
sDP4+ (H data)		1.81369e-21	1	7.87067e-43	2.2687e-17	-	-	-	-	-	-	-	-	-	-	-	-
sDP4+ (C data)		0.000767575	0.998225	0.000996368	1.07774e-05	-	-	-	-	-	-	-	-	-	-	-	-
sDP4+ (all data)		1.39461e-24	1	7.85603e-46	2.44941e-22	-	-	-	-	-	-	-	-	-	-	-	-
uDP4+ (H data)		0.612229	0.236928	5.47418e-05	0.150788	-	-	-	-	-	-	-	-	-	-	-	-
uDP4+ (C data)		3.75857e-06	0.00346802	0.99652	8.52294e-06	-	-	-	-	-	-	-	-	-	-	-	-
uDP4+ (all data)		0.00261545	0.93392	0.0620034	0.00146072	-	-	-	-	-	-	-	-	-	-	-	-
DP4+ (H data)		4.68661e-21	1	1.8185e-46	1.44386e-17	-	-	-	-	-	-	-	-	-	-	-	-
DP4+ (C data)		6.47616e-07	0.777115	0.222885	2.06194e-08	-	-	-	-	-	-	-	-	-	-	-	-
DP4+ (all data)		3.90563e-27	1	5.21566e-47	3.83105e-25	-	-	-	-	-	-	-	-	-	-	-	-
