# Supplementary material for: Heterodimeric diketopiperazine alkaloids from Penicillium expansum MA147 and their cytotoxicity
Source: Royal Society of Chemistry journal article supplement (doi:10.1039/d4ob01245c), 2024-01-01

The 1D/2D NMR of compound 3 was firstly measured in methanol-d4 in the period between 28/5/2021 and 3/6/2021. Because the lack of signals for some active protons, we changed the NMR solvent into acetone-d6 to measure another set of 1D/2D NMR spectra, and we successfully elucidated the structure based on it. However, the H-21 is a slowly exchangeable proton in methanol-d4, as the decrease of integral area of H-21 (7.69 ppm) from 28/5/2021 to 3/6/2021. When we changed the solvent into acetone-d6 to measure NMR on 19/7/2021, the signal of H-21 was not fully recovered. Moreover, this sample was contaminated by diacetone alcohol. Afterwards, we purified this sample and measured the 1H NMR in acetone-d6 again on 15/5/2022, and the signal of H-21 was restored. The comparison between this 1H NMR spectra are attached below.


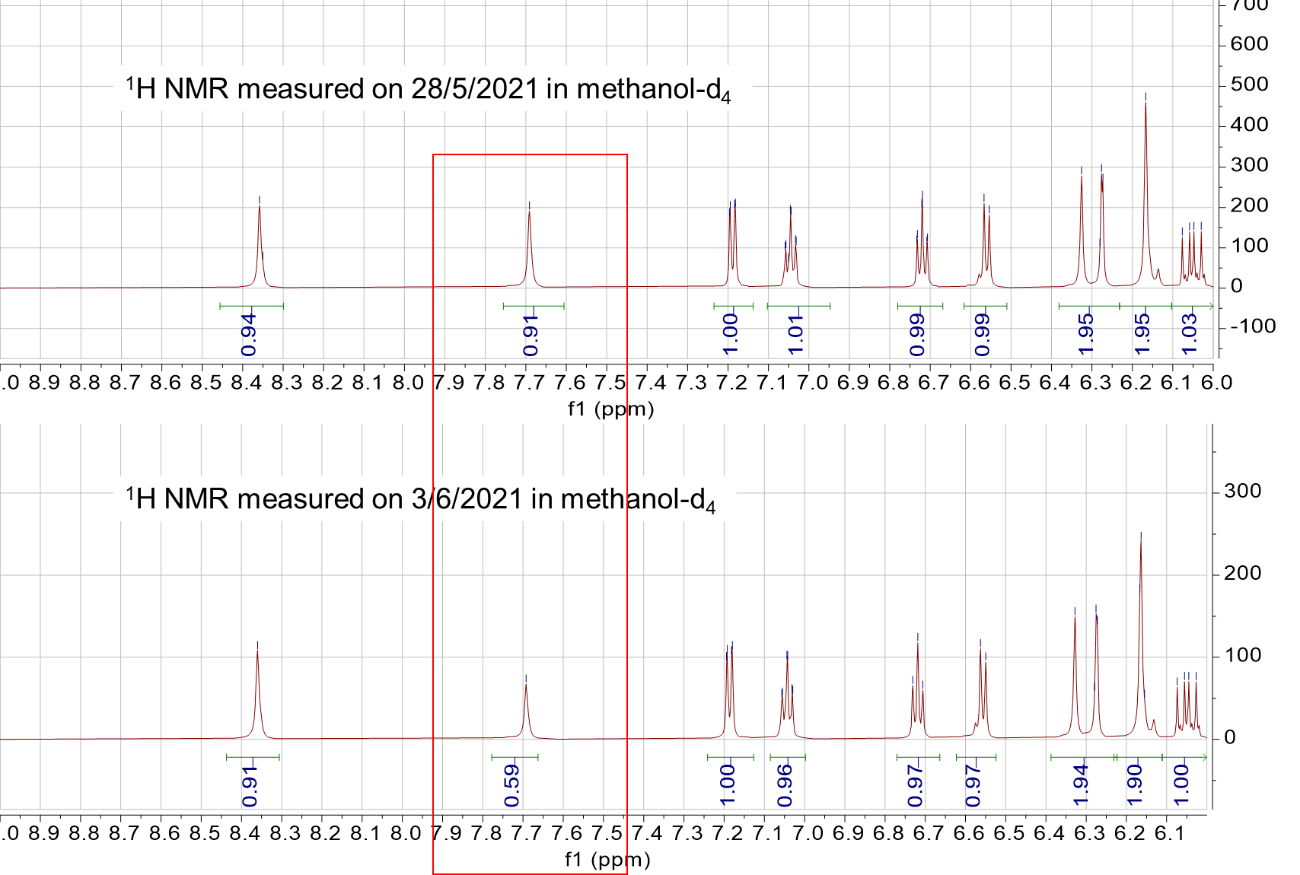


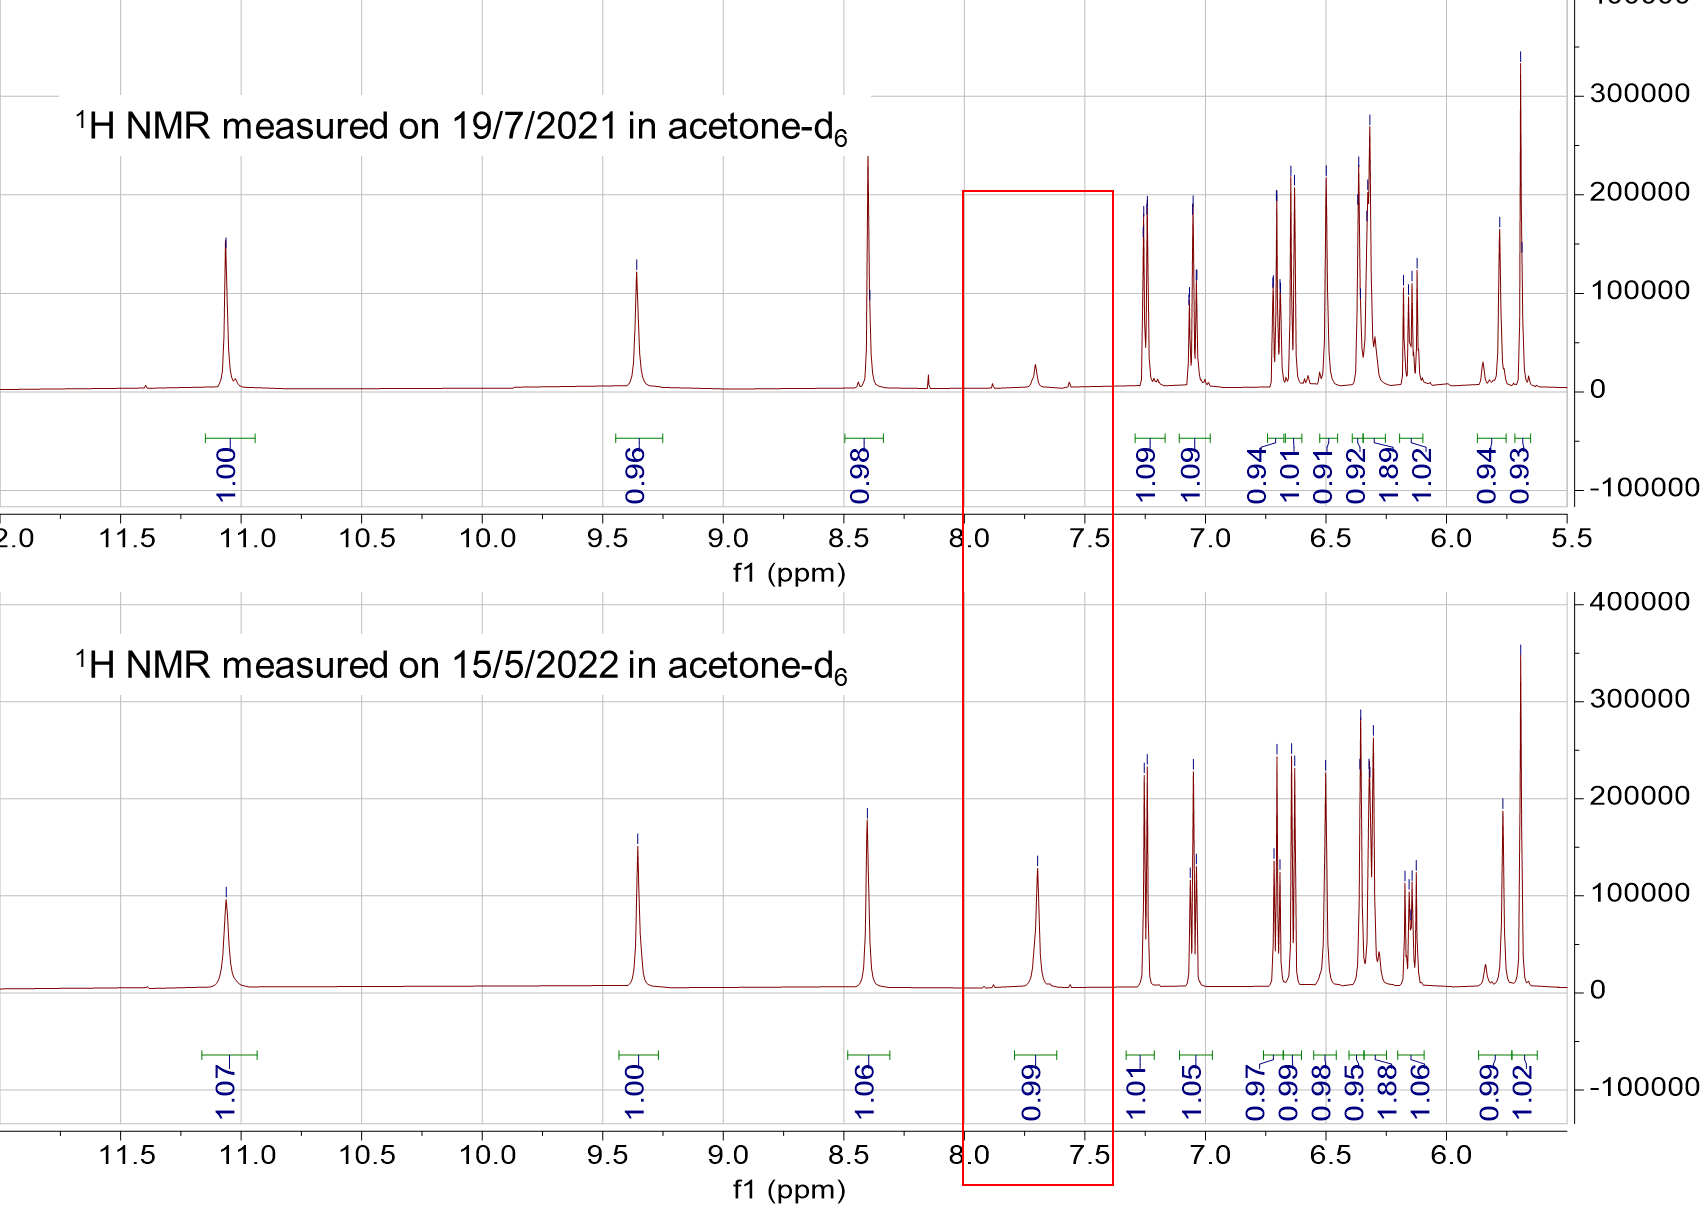

Supplement: d4ob01245c4.zip [file readme_compound_3.docx]
